# Supplementary material for: From metal–organic framework (MOF) to MOF–polymer composite membrane: enhancement of low-humidity proton conductivity
Source: Royal Society of Chemistry journal article supplement (doi:10.1039/c2sc21927a), 2012-11-26
Supplement: c2sc21927a.pdf [file c2sc21927a.pdf]

## **From Metal-Organic Framework (MOF) to MOF/Polymer Composite Membrane: Enhancement of Low-Humidity Proton Conductivity**

Xiaoqiang Liang<sup>a,b,§</sup>, Feng Zhang<sup>a,§</sup>, Wei Feng<sup>c</sup>, Xiaoqin Zou<sup>a</sup>, Chengji Zhao<sup>d</sup>, Hui Na<sup>d</sup>, Cong Liu<sup>d</sup>, Fuxing Sun<sup>a</sup> and Guangshan Zhu<sup>a\*</sup>

<sup>a</sup> *State Key Laboratory of Inorganic Synthesis and Preparative Chemistry, College of Chemistry, Jilin University, Changchun 130012, PR China*

<sup>b</sup> *College of Environmental and Chemical Engineering, Xi'an Polytechnic University, Xi'an, 710048, PR China*

<sup>c</sup> *Key Lab of Groundwater Resources and Environment, Ministry of Education, Jilin University, Jiefang Road 2519, Changchun 130021, PR China*

<sup>d</sup> *Alan G. MacDiarmid Institute, College of Chemistry, Jilin University, Changchun 130012, PR China*

§ These authors contributed equally to this work.

**Table S1** Selected bond lengths (Å) and angles (°) for **1**

| Complex <b>1</b>  |            |                   |            |
|-------------------|------------|-------------------|------------|
| Ca(1)–O(1)        | 2.319(3)   | Ca(1)–O(1W)       | 2.383(3)   |
| Ca(1)–O(2a)       | 2.389(4)   | Ca(1)–O(2b)       | 2.411(3)   |
| Ca(1)–O(2W)       | 2.487(3)   | Ca(1)–O(4c)       | 2.502(3)   |
| Ca(1)–O(5c)       | 2.664(3)   | Ca(1)–O(1b)       | 2.769(3)   |
| O(1)–Ca(1)–O(1W)  | 84.18(11)  | O(1)–Ca(1)–O(2a)  | 136.43(11) |
| O(1W)–Ca(1)–O(2a) | 76.88(11)  | O(1)–Ca(1)–O(2b)  | 79.31(12)  |
| O(1W)–Ca(1)–O(2b) | 157.61(11) | O(2a)–Ca(1)–O(2b) | 125.47(9)  |
| O(1)–Ca(1)–O(2W)  | 78.82(12)  | O(1W)–Ca(1)–O(2W) | 107.13(11) |
| O(2a)–Ca(1)–O(2W) | 70.15(12)  | O(2b)–Ca(1)–O(2W) | 84.47(10)  |
| O(1)–Ca(1)–O(4c)  | 132.50(11) | O(1W)–Ca(1)–O(4c) | 85.48(12)  |
| O(2a)–Ca(1)–O(4c) | 85.03(11)  | O(2b)–Ca(1)–O(4c) | 94.58(11)  |
| O(2W)–Ca(1)–O(4c) | 148.06(12) | O(1)–Ca(1)–O(5c)  | 82.25(11)  |
| O(1W)–Ca(1)–O(5c) | 81.31(11)  | O(2a)–Ca(1)–O(5c) | 131.60(11) |
| O(2b)–Ca(1)–O(5c) | 81.57(10)  | O(2W)–Ca(1)–O(5c) | 158.25(12) |
| O(4c)–Ca(1)–O(5c) | 50.35(10)  | O(1)–Ca(1)–O(1b)  | 132.24(9)  |
| O(1W)–Ca(1)–O(1b) | 143.03(11) | O(2a)–Ca(1)–O(1b) | 71.22(9)   |
| O(2b)–Ca(1)–O(1b) | 56.75(10)  | O(2W)–Ca(1)–O(1b) | 79.23(10)  |
| O(4c)–Ca(1)–O(1b) | 73.79(10)  | O(5c)–Ca(1)–O(1b) | 106.38(10) |

Symmetry codes : a)  $x-1, y, z$ ; b)  $x-1/2, -y+1/2, -z+1$ ; c)  $x-1, y-1, z$  for **1**.

**Table S2** Hydrogen-bonding geometry parameters (Å, °) for compound **1**

| D–H...A             | d(D–H) | d(H...A) | d(D...A) | ∠(DHA) |
|---------------------|--------|----------|----------|--------|
| Complex <b>1</b>    |        |          |          |        |
| N(1)–H(1)...O(2Wd)  | 0.91   | 2.24     | 3.080(5) | 153.9  |
| N(6)–H(1)...O(2)    | 0.91   | 2.36     | 2.911(5) | 119.0  |
| O(1W)–H(1Y)...O(3a) | 0.96   | 1.84     | 2.782(4) | 167.4  |
| O(2W)–H(2X)...O(5e) | 0.96   | 1.89     | 2.837(5) | 167.2  |
| O(2W)–H(2Y)...O(4f) | 0.96   | 1.81     | 2.722(5) | 157.8  |

Symmetry codes: a)  $x-1, y, z$ ; d)  $x+1, y, z$ ; e)  $x-3/2, -y+3/2, -z+1$ ; f)  $x-1/2, -y+3/2, -z+1$  for **1**.

**Table S3** Proton Conductivity of the MOFs under Ambient Conditions

| compound                                                                                                 | $\sigma$ (S cm <sup>-1</sup> ) | RH (%) | T (K) | reference |
|----------------------------------------------------------------------------------------------------------|--------------------------------|--------|-------|-----------|
| Mn(dhbq)(H <sub>2</sub> O) <sub>2</sub> <sup>a</sup>                                                     | $3.5 \times 10^{-9}$           | 60     | 298   | Ref21     |
| (HOC <sub>2</sub> H <sub>4</sub> ) <sub>2</sub> dtoaCu <sup>b</sup>                                      | $5.9 \times 10^{-8}$           | 70     | 300   | Ref22     |
| Zn <sub>3</sub> (L)(H <sub>2</sub> O) <sub>2</sub> ·2H <sub>2</sub> O <sup>c</sup>                       | $1.4 \times 10^{-6}$           | 75     | 298   | Ref23     |
| (NH <sub>4</sub> ) <sub>2</sub> (adp)[Zn <sub>2</sub> (ox) <sub>3</sub> ]·2H <sub>2</sub> O <sup>d</sup> | $6.0 \times 10^{-6}$           | 70     | 298   | Ref24     |
| {NH(prol) <sub>3</sub> }[MnCr(ox) <sub>3</sub> ]·2H <sub>2</sub> O <sup>e</sup>                          | $2.0 \times 10^{-6}$           | 65     | 298   | Ref25     |
| Co[Cr(CN) <sub>6</sub> ] <sub>2/3</sub> ·zH <sub>2</sub> O                                               | $2.9 \times 10^{-5}$           | 69     | 293   | Ref26     |
| (NH <sub>4</sub> ) <sub>4</sub> [MnCr <sub>2</sub> (ox) <sub>6</sub> ]·4H <sub>2</sub> O                 | $3.0 \times 10^{-5}$           | 69     | 295   | Ref27     |
| {NMe <sub>3</sub> (CH <sub>2</sub> COOH)}[FeCr(ox) <sub>3</sub> ]·n<br>H <sub>2</sub> O                  | $8 \times 10^{-5}$             | 65     | 298   | Ref28     |
| {[Ca(D-Hpmpc)(H <sub>2</sub> O) <sub>2</sub> ]·2HO <sub>0.5</sub> } <sub>n</sub><br>composite membrane   | $2.8 \times 10^{-5}$           | 53     | 298   | this work |

<sup>a</sup>H<sub>2</sub>dhbq = 2,5-dihydroxy-1,4-benzoquinone.

<sup>b</sup>prol = -C<sub>3</sub>H<sub>7</sub>OH.

<sup>c</sup>adp = adipic acid.

<sup>d</sup>L = 1,3,5-benzenetriphosphonate.

<sup>e</sup>dtoa = dithiooxamide.

**Table S4** Relative atomic ratio (%) of main elements in pure PVP and composite membranes, and MOF 1 samples

| Sample                         | Element |                              | Peak position (eV) | Relative atomic ratio (%) |
|--------------------------------|---------|------------------------------|--------------------|---------------------------|
| PVP                            | Ca 2p   | Ca 2p <sub>1/2</sub>         | -                  | 0                         |
|                                |         | Ca 2p <sub>3/2</sub>         | -                  |                           |
|                                | P 2p    |                              | -                  | 0                         |
|                                | N 1s    | NR <sub>3</sub> <sup>a</sup> | 399.40             | 100                       |
| HNR <sub>3</sub> <sup>+b</sup> |         | -                            |                    |                           |
| MOF 1/PVP-3                    | Ca 2p   | Ca 2p <sub>1/2</sub>         | 350.80             | 1.23                      |
|                                |         | Ca 2p <sub>3/2</sub>         | 346.95             |                           |
|                                | P 2p    |                              | 132.72             | 1.46                      |
|                                | N 1s    | NR <sub>3</sub> <sup>a</sup> | 399.35             | 97.31                     |
| HNR <sub>3</sub> <sup>+b</sup> |         | 401.61                       |                    |                           |
| MOF 1/PVP-5                    | Ca 2p   | Ca 2p <sub>1/2</sub>         | 350.80             | 1.82                      |
|                                |         | Ca 2p <sub>3/2</sub>         | 346.95             |                           |
|                                | P 2p    |                              | 132.73             | 1.76                      |
|                                | N 1s    | NR <sub>3</sub> <sup>a</sup> | 399.25             | 96.42                     |
| HNR <sub>3</sub> <sup>+b</sup> |         | 401.66                       |                    |                           |
| MOF 1/PVP-10                   | Ca 2p   | Ca 2p <sub>1/2</sub>         | 350.80             | 3.81                      |
|                                |         | Ca 2p <sub>3/2</sub>         | 346.9              |                           |
|                                | P 2p    |                              | 132.80             | 3.69                      |
|                                | N 1s    | NR <sub>3</sub> <sup>a</sup> | 399.34             | 92.50                     |
| HNR <sub>3</sub> <sup>+b</sup> |         | 401.64                       |                    |                           |
| MOF 1/PVP-20                   | Ca 2p   | Ca 2p <sub>1/2</sub>         | 350.60             | 7.41                      |
|                                |         | Ca 2p <sub>3/2</sub>         | 346.78             |                           |
|                                | P 2p    |                              | 132.78             | 6.93                      |
|                                | N 1s    | NR <sub>3</sub> <sup>a</sup> | 399.28             | 85.66                     |
| HNR <sub>3</sub> <sup>+b</sup> |         | 401.68                       |                    |                           |
| MOF 1/PVP-30                   | Ca 2p   | Ca 2p <sub>1/2</sub>         | 350.40             | 11.12                     |
|                                |         | Ca 2p <sub>3/2</sub>         | 346.75             |                           |
|                                | P 2p    |                              | 132.76             | 10.47                     |
|                                | N 1s    | NR <sub>3</sub> <sup>a</sup> | 399.38             | 78.41                     |
| HNR <sub>3</sub> <sup>+b</sup> |         | 401.69                       |                    |                           |
| MOF 1/PVP-50                   | Ca 2p   | Ca 2p <sub>1/2</sub>         | 350.30             | 18.43                     |
|                                |         | Ca 2p <sub>3/2</sub>         | 346.81             |                           |
|                                | P 2p    |                              | 132.78             | 17.12                     |
|                                | N 1s    | NR <sub>3</sub> <sup>a</sup> | 399.34             | 64.45                     |
| HNR <sub>3</sub> <sup>+b</sup> |         | 401.61                       |                    |                           |
| MOF 1                          | Ca 2p   | Ca 2p <sub>1/2</sub>         | 350.52             | 31.89                     |
|                                |         | Ca 2p <sub>3/2</sub>         | 347.01             |                           |
|                                | P 2p    |                              | 132.78             | 33.94                     |
|                                | N 1s    | NR <sub>3</sub> <sup>a</sup> | -                  | 34.17                     |
| HNR <sub>3</sub> <sup>+b</sup> |         | 401.68                       |                    |                           |

a: the tertiary nitrogen;

b: the protonated tertiary nitrogen.

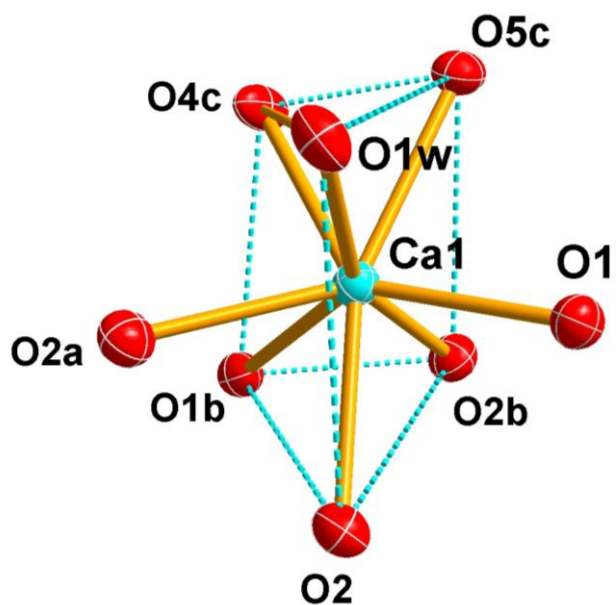

**Fig. S1** Local coordination geometry of Ca (II) ion in MOF **1** (Cyan: Ca<sup>2+</sup>, Red: O).  
(Symmetry codes: a)  $x-1, y, z$ ; b)  $x-1/2, -y+1/2, -z+1$ ; c)  $x-1, y-1, z$ ).

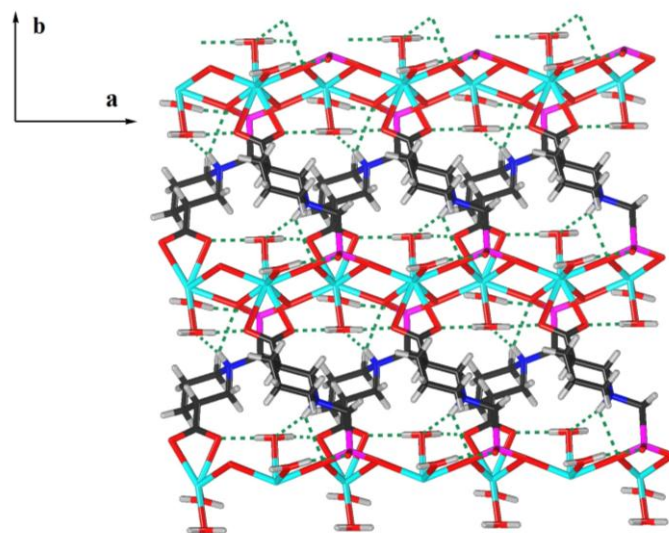

**Fig. S2** Versatile hydrogen-bonding interactions observed in MOF **1** (Black, C; blue, N; Red, O; Cyan, Ca; Magenta, P; Light Gray, H).

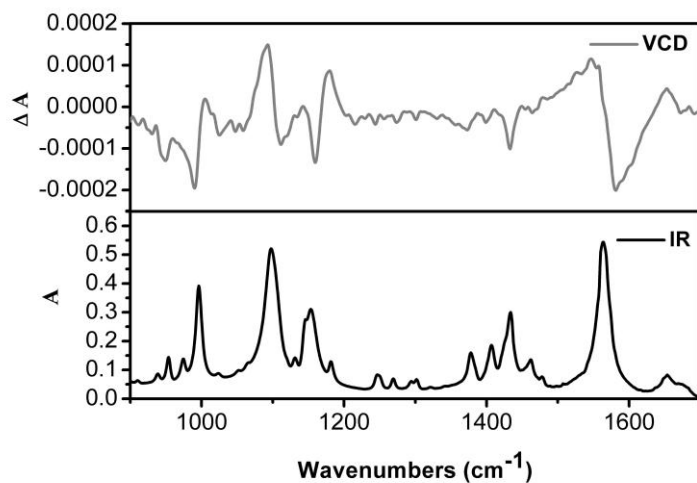

**Fig. S3** The VCD (top) and IR absorption spectrum (bottom) of MOF **1** in the solid state at room temperature.

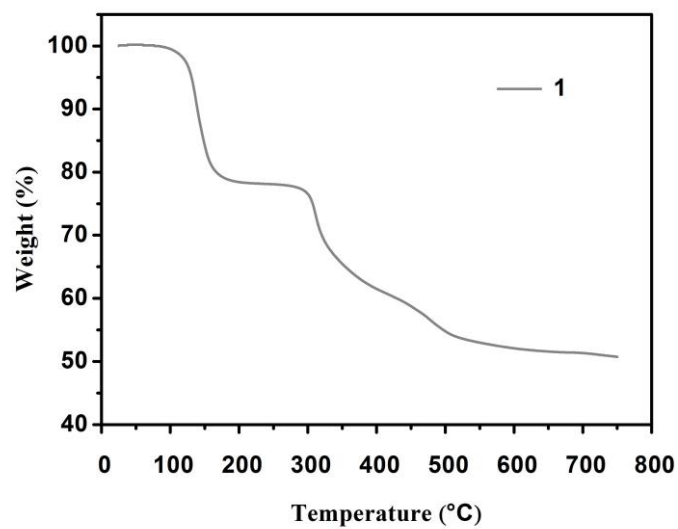

**Fig. S4** Thermogravimetric curve for MOF **1**.

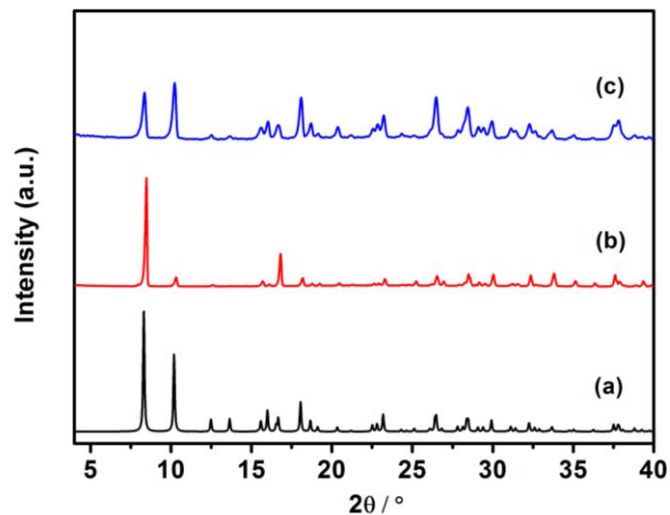

**Fig. S5** PXR D patterns of (a) a simulation based on single-crystal analysis of MOF 1, (b) as-synthesized bulk crystals of MOF 1, and (c) as-synthesized submicrorods of MOF 1.

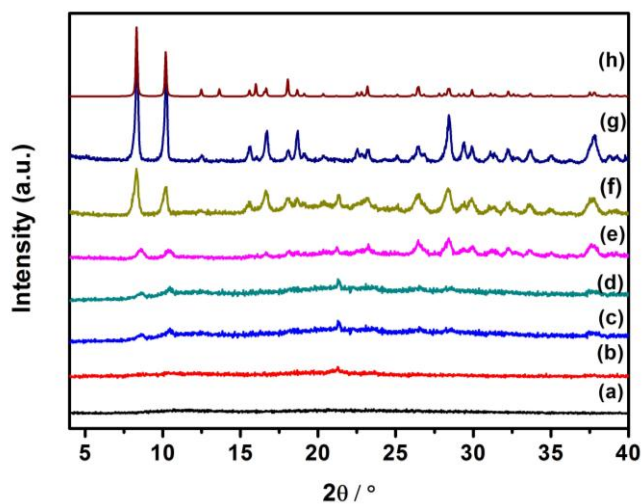

**Fig. S6** PXR D patterns of pure PVP, MOF/polymer composite membranes and MOF 1 single crystal simulation ((a) pure PVP, (b) MOF 1/PVP-3, (c) MOF 1/PVP-5, (d) MOF 1/PVP-10, (e) MOF 1/PVP-20, (f) MOF 1/PVP-30, (g) MOF 1/PVP-50, and (h) the simulated one from single crystal).

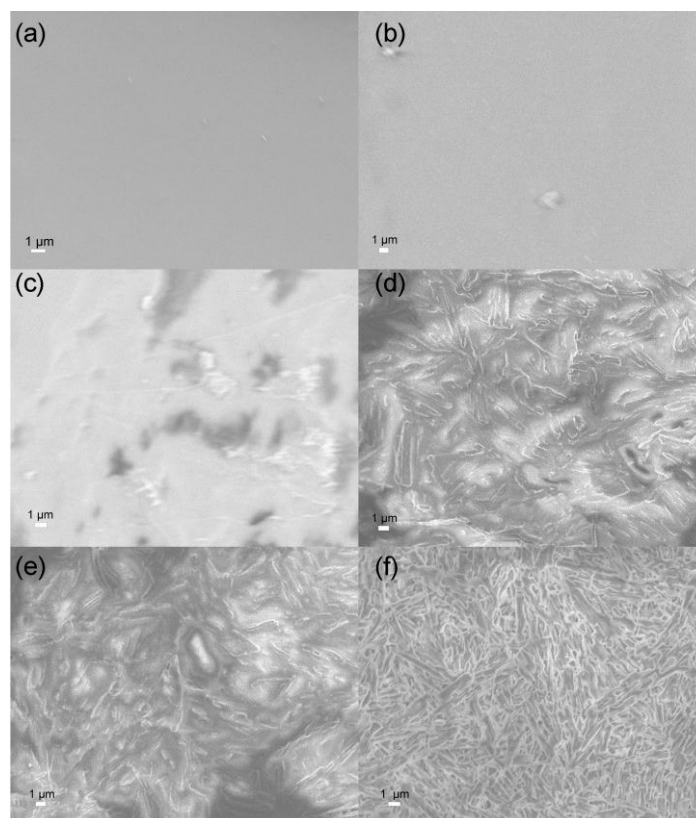

**Fig. S7** Top views of SEM images of (a) pure PVP, (b) MOF 1/PVP-3, (c) MOF 1/PVP-5, (d) MOF 1/PVP-10, (e) MOF 1/PVP-20, and (f) MOF 1/PVP-30 composite membranes.

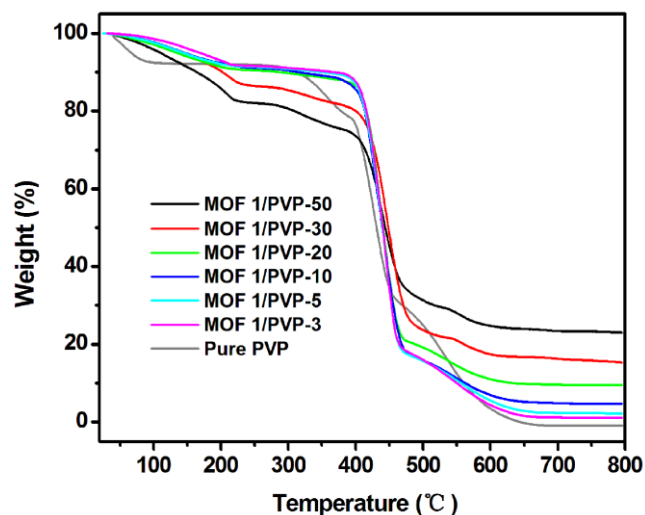

**Fig. S8** Thermogravimetric curves for pure PVP and MOF/PVP composite membranes with different contents of MOF 1.



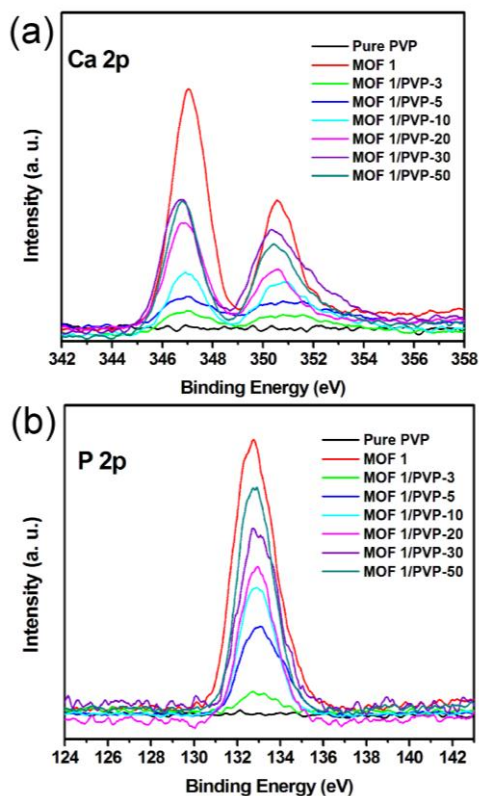

**Fig. S9** XPS spectra of MOF/PVP composite membranes with different contents of MOF 1; XPS signals of the core-level (a) Ca 2p, (b) P 2p for pure PVP, MOF 1 and the composite membranes.

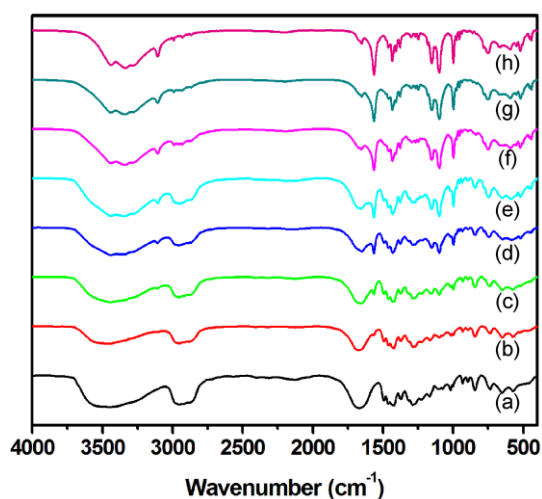

**Fig. S10** FTIR spectra of pure PVP, MOF 1 and the composite membranes ((a) pure PVP, (b) MOF 1/PVP-3, (c) MOF 1/PVP-5, (d) MOF 1/PVP-10, (e) MOF 1/PVP-20, (f) MOF 1/PVP-30, (g) MOF 1/PVP-50, and (h) MOF 1).

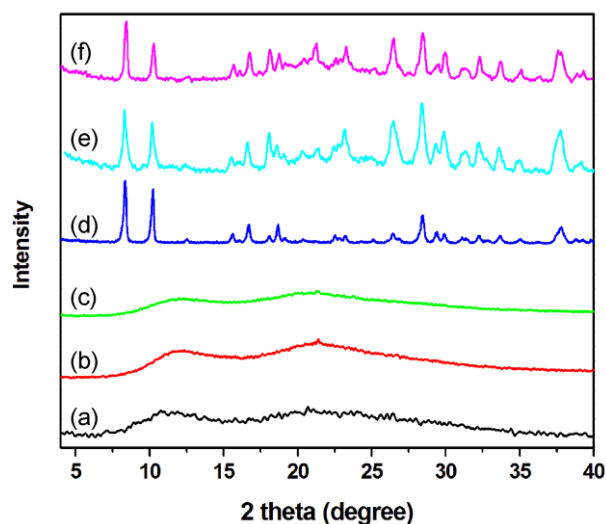

**Fig. S11** PXRD patterns of (a) pure PVP, (b) PVP exposed to air, (c) PVP exposed to oxygen, (d) MOF 1/PVP-50, (e) MOF 1/PVP-50 exposed to air, and (f) MOF 1/PVP-50 exposed to oxygen at 333 K for 24 h for the test of oxidative stability.

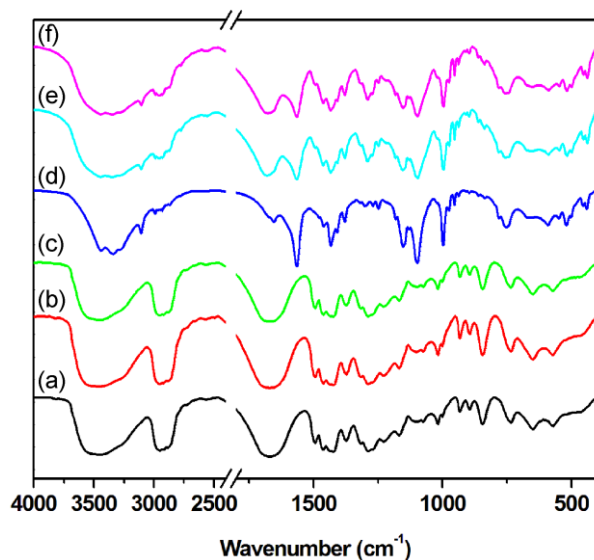

**Fig. S12** FTIR spectra of (a) pure PVP, (b) PVP exposed to air, (c) PVP exposed to oxygen, (d) MOF 1/PVP-50, (e) MOF 1/PVP-50 exposed to air, and (f) MOF 1/PVP-50 exposed to oxygen at 333 K for 24 h for the test of oxidative stability.

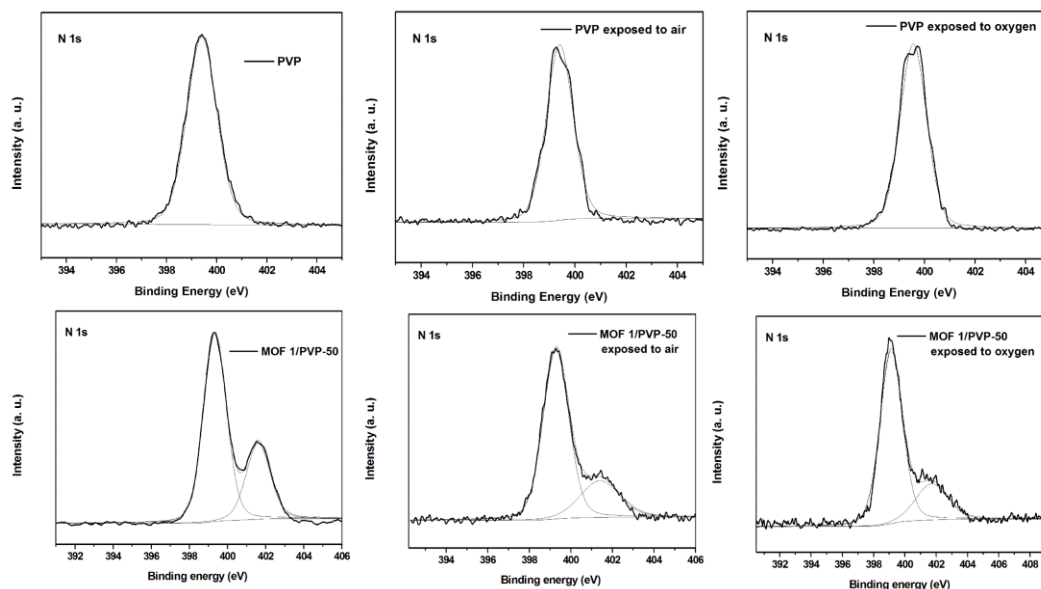

**Fig. S13** XPS spectra of N 1s signal of pure PVP, and MOF 1/PVP-50 without and with exposure to air and oxygen flows at 333 K for 24 h for the test of oxidative stability.

**Table S5** Chemical environment of nitrogen for the tertiary nitrogen in pure PVP and MOF 1/PVP-50

| Sample                               | Element                                            | Peak position (eV) | Band area | Nitrogen relative atomic ratio (%) |
|--------------------------------------|----------------------------------------------------|--------------------|-----------|------------------------------------|
| PVP                                  | N 1s (NR <sub>3</sub> ) <sup>a</sup>               | 399.40             | 25197.96  | 100                                |
| PVP exposed to air flows             | N 1s (NR <sub>3</sub> ) <sup>a</sup>               | 399.41             | 20140.39  | 100                                |
| PVP exposed to oxygen flows          | N 1s (NR <sub>3</sub> ) <sup>a</sup>               | 399.41             | 23582.33  | 100                                |
| MOF 1/PVP-50                         | N 1s (HNR <sub>3</sub> <sup>+</sup> ) <sup>b</sup> | 401.61             | 9110.03   | 26.05                              |
|                                      | N 1s (NR <sub>3</sub> ) <sup>a</sup>               | 399.34             | 25855.04  | 73.95                              |
| MOF 1/PVP-50 exposed to air flows    | N 1s (HNR <sub>3</sub> <sup>+</sup> ) <sup>b</sup> | 401.40             | 5332.07   | 25                                 |
|                                      | N 1s (NR <sub>3</sub> ) <sup>a</sup>               | 399.28             | 15999.99  | 75                                 |
| MOF 1/PVP-50 exposed to oxygen flows | N 1s (HNR <sub>3</sub> <sup>+</sup> ) <sup>b</sup> | 401.43             | 4304.17   | 22.88                              |
|                                      | N 1s (NR <sub>3</sub> ) <sup>a</sup>               | 399.32             | 14505.07  | 77.12                              |

a: the tertiary nitrogen;

b: the protonated tertiary nitrogen.

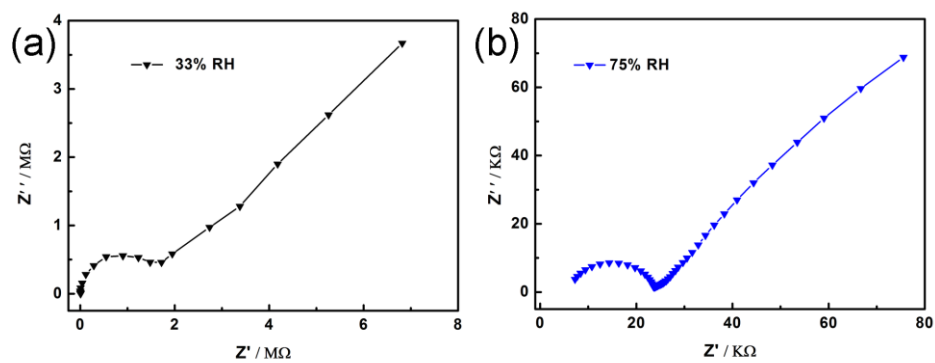

**Fig. S14** Nyquist plots of MOF 1 submicrorods (a) ~33% RH and (b) ~75% RH at 298 K.

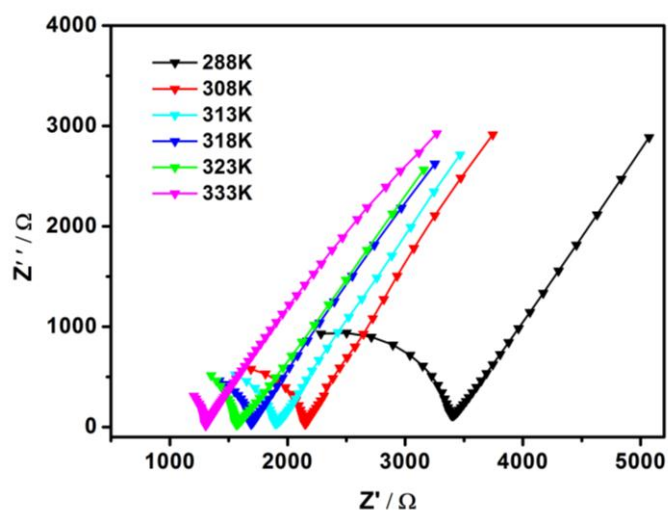

**Fig. S15** Nyquist plots of MOF 1 submicrorods at different temperatures and ~97% RH (relative humidity).

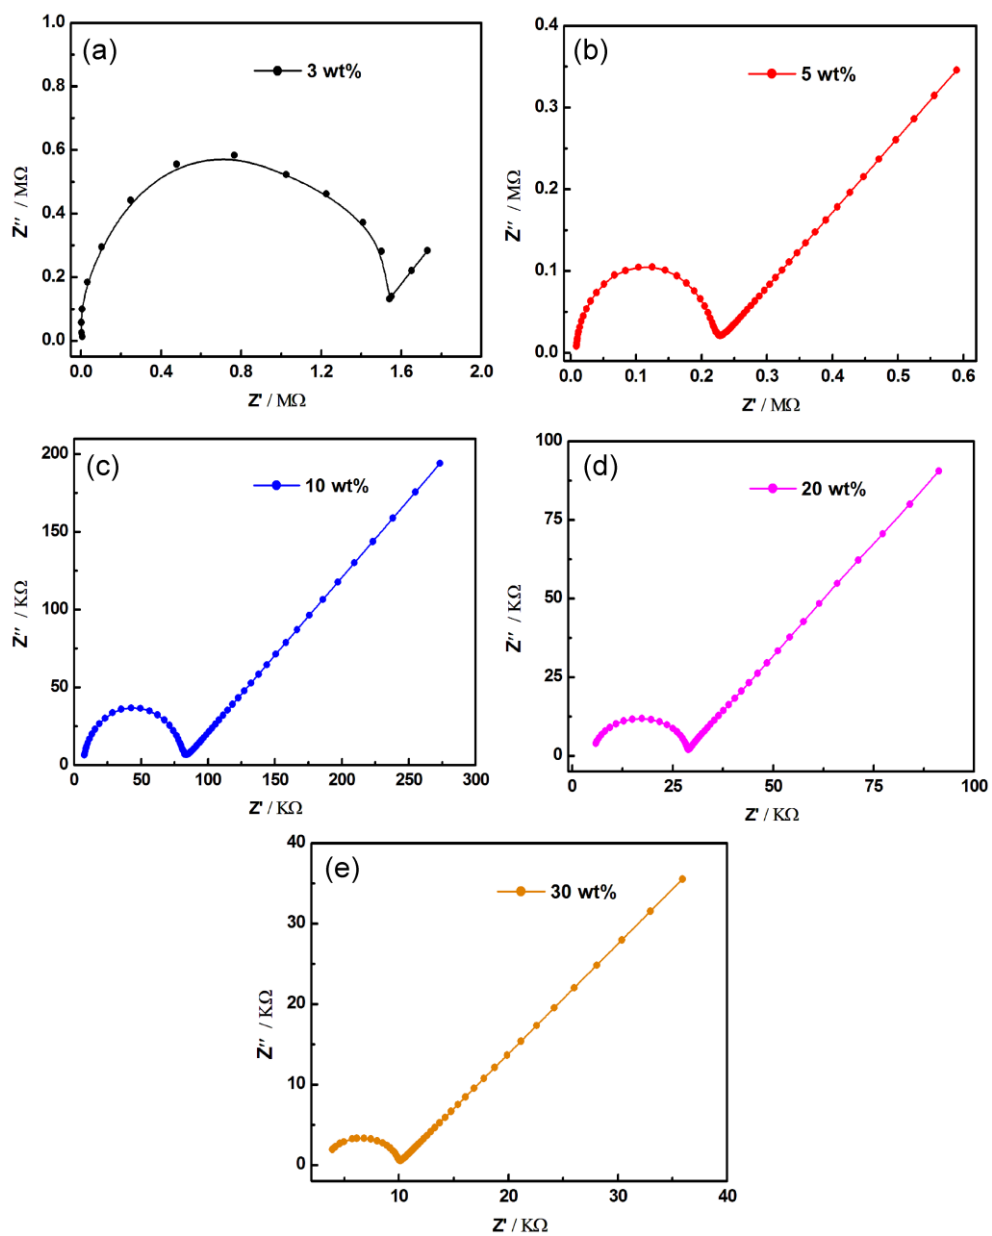

**Fig. S16** Nyquist plots of MOF/PVP composite membranes with different contents of MOF 1 at ~53% RH and 333 K; (a) MOF 1/PVP-3, (b) MOF 1/PVP-5, (c) MOF 1/PVP-10, (d) MOF 1/PVP-20 and (e) MOF 1/PVP-30.

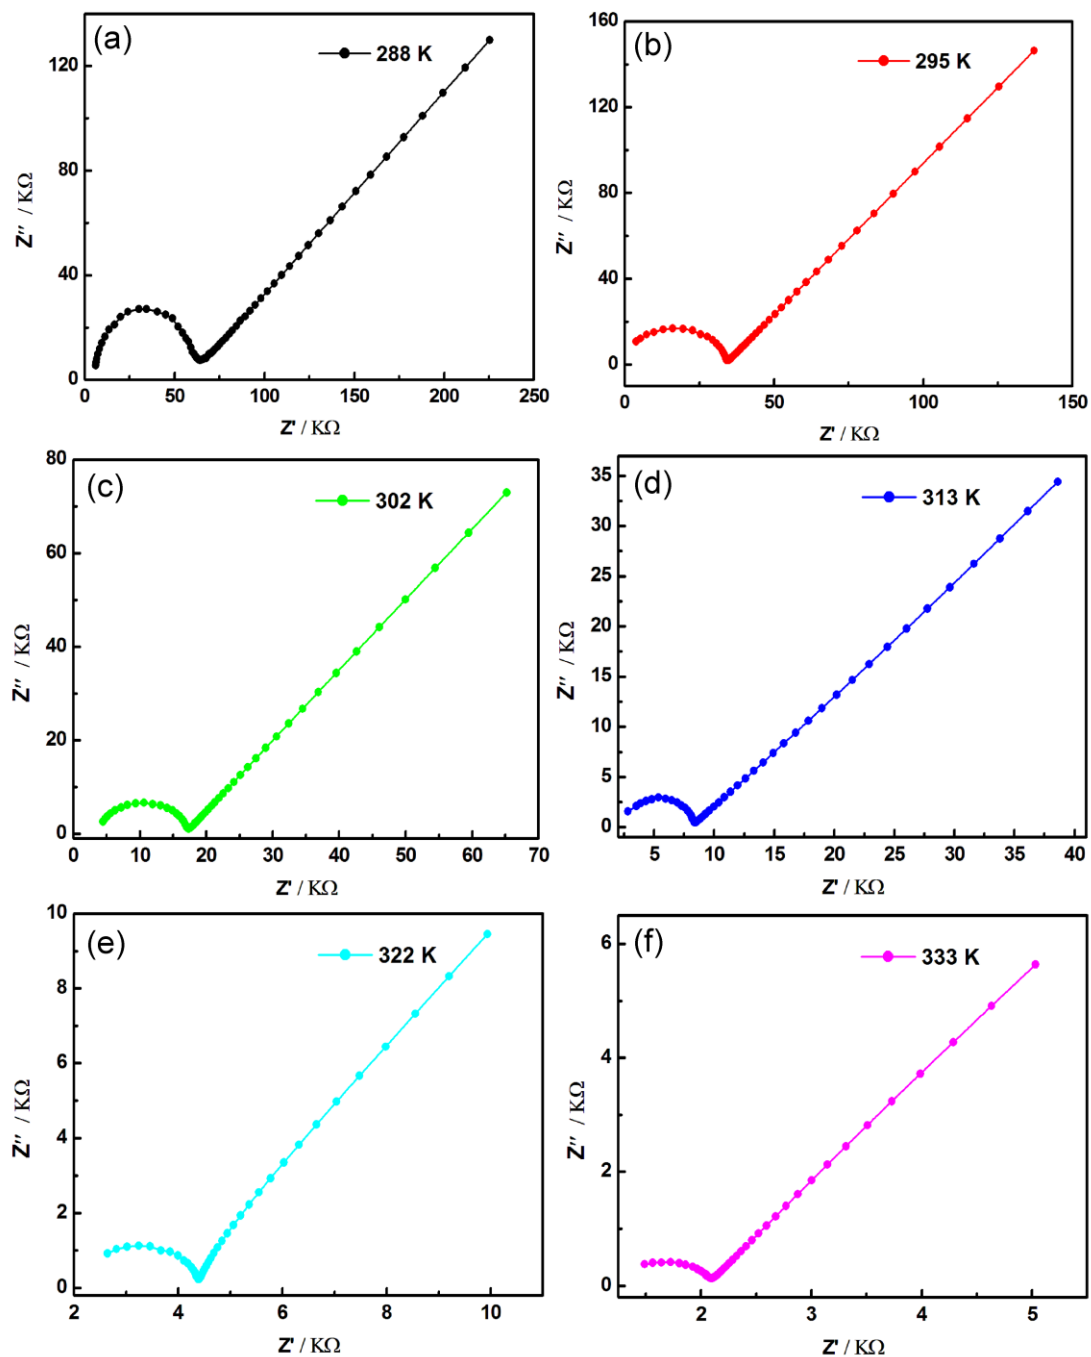

**Fig. S17** Nyquist plots of MOF/PVP composite membranes containing 50% MOF **1** at different temperatures ((a) 288 K, (b) 295 K, (c) 302 K, (d) 313 K, (e) 322 K, and (f) 333 K) and ~53% RH.

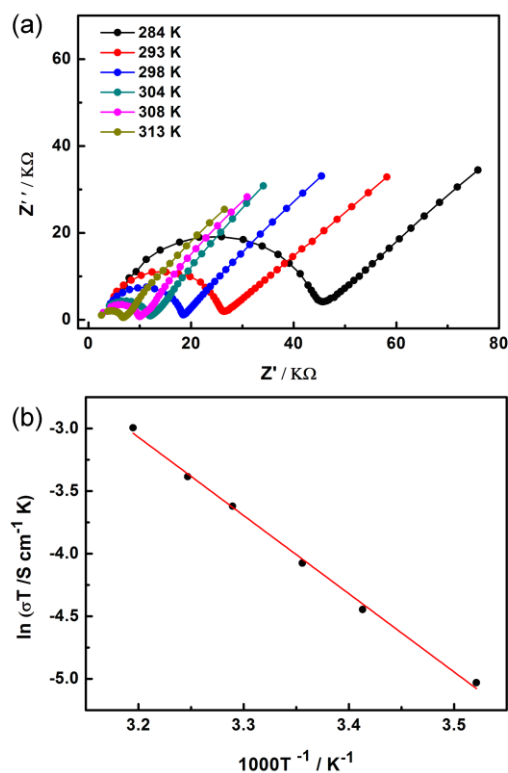

**Fig. S18** (a) Nyquist plots of MOF 1/PVP-50 composite membrane at different temperatures and  $\sim 65\%$  RH (relative humidity); (b) Arrhenius-type plot of conductivity for the MOF 1/PVP-50 composite membrane in function of temperature and under  $\sim 65\%$  RH condition.

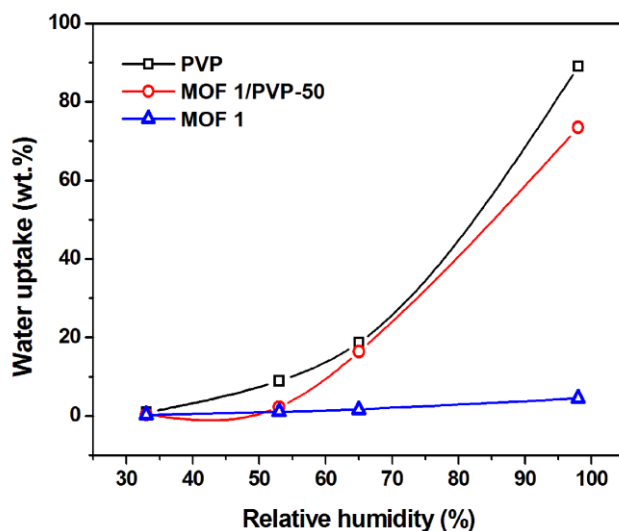

**Fig. S19** Water uptakes of pure PVP, MOF 1/PVP-50 composite membrane and MOF 1 at 298 K in function of relative humidity.

### Cost estimation for composite membranes

In order to estimate the gross cost of as-prepared MOF/PVP composite membranes, the price of each starting chemical is listed below:

DL-piperidine-3-carboxylic acid hydrochloride: 0.48-0.80 USD/g

H<sub>3</sub>PO<sub>3</sub>: 0.024 USD/g

HCHO: 0.0067 USD/mL (36%)

Solvent: 0.0192 USD/mL

Energy: 0.0601 USD/g

Productivity: 60.0% (based on DL-piperidine-3-carboxylic acid hydrochloride)

H<sub>3</sub>pmpc ligand: 1.24-1.60 USD/g (H<sub>3</sub>pmpc=D, L-1-(phosphonomethyl)piperidine-3-carboxylic acid)

H<sub>3</sub>pmpc ligand: 1.24-1.60 USD/g,

CaO: 0.039 USD/g,

Solvent: 0.41 USD/100 mL,

Energy cost: 0.29 USD/g,

Productivity of MOF 1: 61.5% (based on H<sub>3</sub>pmpc compound),

MOF 1: 1.86-2.27 USD/g (MW = 315.27),

PVP: 0.283 USD/g,

The weight and the area of the MOF 1/PVP-50 membrane are estimated to be 0.03-0.032 g and 1.92 cm<sup>2</sup>.

The gross cost of MOF 1/PVP-50 composite membrane per square meter can be calculated as follows:

$$\begin{aligned}\text{Cost (USD /m}^2\text{)} &= \frac{\text{Membrane mass (g)} \times [\text{MOF price (RMB/g)} + \text{PVP price (RMB/g)}]}{2 \times \text{Membrane surface (m}^2\text{)}} \\ &= \frac{0.03 \times (1.86 + 0.283)}{2 \times 1.92 \times 10^{-4}} \\ &= 167.42 \text{ USD /m}^2\end{aligned}$$

The cost of commercial Nafion membrane is about 600-1200 USD/m<sup>2</sup>[1,2] and the price of Nafion® 117 membrane (CAS No.: 31175-20-9) is 377.5 USD for 8 inch × 10 inch (7314 USD/m<sup>2</sup>) from Sigma-Aldrich. By comparison, it is found that the MOF 1/PVP-50 composite membrane is more economic than Nafion® 117 membrane.

[1] S. K. Kamarudina, F. Achmada, W. R. W. Dauda, Overview on the application of direct methanol fuel cell (DMFC) for portable electronic devices, *International Journal of Hydrogen Energy*, **2009**, 34, 6902-6916.



[2] E. E. Unverena, T. Erdogana, S. S. Çelebib, T. Y. Inan, *International Journal of Hydrogen Energy*, **2010**, 35, 3736–3744.
